# Supplementary material
Source: HighWire-hosted journal article supplement (https://www.annfammed.org/highwire/filestream/15137/field_highwire_adjunct_files/0/Tin_Supp.pdf)
Supplement: Tin_Supp.pdf [file Tin_Supp.pdf]

**Supplemental materials for**

Tin AH, Kuehl K, Terry A, Meisner J, Ramirez V, Tabor E, Rabinowitz P. A One Health clinic for people experiencing homelessness and their animals: treating the human-animal unit. *Ann Fam Med*. 2022;20(5):487.

**Supplemental Appendix. Navigator Form**

**UDSM/Neighborcare One Health Clinic Human-Animal Care Tracking Form**  
(to be scanned into Neighborcare chart)

Date UDSM Client #

Owner Name Age Gender Pronouns

**ANIMAL 1**

Name \_\_\_\_\_ Age \_\_\_\_\_ Sex \_\_\_\_\_ Species/breed \_\_\_\_\_

Spayed? Yes No New Patient? Yes No

**Documented ESA/service animal: (check one that applies)**

- ADA Service Animal
- Emotional Support Animal with documentation (letter from health provider)  Emotional Support Animal, no documentation
- Companion Animal/Pet
- Other: \_\_\_\_\_

**Where animal spends Daytime** \_\_\_\_\_ **Where animal sleeps** \_\_\_\_\_

**Environmental Concerns:**  Heat  Cold  Rain  Food security  Injury  noise  sanitation issues  
 Other: \_\_\_\_\_

**Animal Behavior Concerns:**  conflict with people  conflict with animals  Other: \_\_\_\_\_

**Chief animal health Concern**

**HUMAN-ANIMAL CONNECTION**

**How long has patient had the above animal?**

**Barriers to animal ownership**  access to health care  housing problems  sanitation issues  None  Other: \_\_\_\_\_

**Benefits of animal ownership**  psychological  safety  Other: \_\_\_\_\_ **Findings**

\_\_\_\_\_  
\_\_\_\_\_  
\_\_\_\_\_ **Assessment**

**Animal welfare concerns :**  Yes  No **Care Provided :**  vaccines  meds  other \_\_\_\_\_

**Follow up necessary:**

**HUMAN**

**New Patient?** Yes No **How did you hear about this clinic?**

**Where they spend Daytime** Where they sleep

**Environmental Concerns:**  Heat  Cold  Rain  Food security  Injury  noise  interpersonal conflict  Other: \_\_\_\_\_ **Chief human Health Concern**

-----  
- Findings \_\_\_\_\_  
\_\_\_\_\_  
\_\_\_\_\_

**Assessment** Domestic violence/animal welfare concerns:  Yes  No **Care Provided:**  vaccines  meds  other \_\_\_\_\_ **Follow up necessary:**

-----  
- Rounds notes:  
\_\_\_\_\_  
\_\_\_\_\_  
\_\_\_\_\_  
\_\_\_\_\_  
\_\_\_\_\_  
\_\_\_\_\_  
\_\_\_\_\_  
\_\_\_\_\_  
\_\_\_\_\_  
\_\_\_\_\_

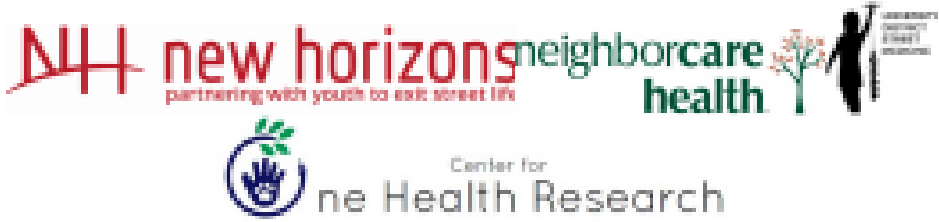

**Supplemental Table 1. Animal Vaccine Data**

|                            | <b>2018</b> | <b>2019</b> | <b>2020 regular</b> | <b>2020 pop-up</b> | <b>2021</b> |
|----------------------------|-------------|-------------|---------------------|--------------------|-------------|
| <b>Unique patients</b>     | 7           | 65          | 8                   | 82                 | 74          |
| • <b>Dogs</b>              | 6           | 37          | 6                   | 66                 | 35          |
| • <b>Cats</b>              | 1           | 27          | 14                  | 15                 | 36          |
| • <b>Other</b>             | 0           | 1           | 2                   | 1                  | 3           |
| <b>Rabies vaccine(all)</b> | 5           | 52          | 4                   | 57                 | 34          |
| <b>Canine DHPP</b>         | 5           | 41          | 1                   | 49                 | 29          |
| <b>Canine Bordatella</b>   | 0           | 27          | 1                   | 30                 | 16          |
| <b>Feline FVRCP</b>        | 0           | 25          | 8                   | 14                 | 37          |

All vaccines are for separate animals. Some are part of a series for the same animal, and most animals will get more than one vaccine when they present to the clinic.
